# Supplementary material for: Comparative Anatomy of Chromosomal Domains with Imprinted and Non-Imprinted Allele-Specific DNA Methylation
Source: PLoS Genet. 2013 Aug 29;9(8):e1003622. doi: 10.1371/journal.pgen.1003622 (PMC3757050; doi:10.1371/journal.pgen.1003622)
Supplement: Table S2 — PCR primers for regional mapping by Fluidigm bisulfite PCR followed by 454 sequencing. (XLSX) [file pgen.1003622.s011.xlsx]

## Sheet: Sheet1
Table S2: Coordinates, primers, and SNPs for long range bisulfite sequencing
Amplicon Number	Chromosome Location (UCSC GRCh37/hg19)	SNP	Allele Type	Heterozygosity	CpG Sites in Product	Product Size (bp)	Forward Primer	Reverse Primer	Annealing Temp
STEAP3 1	chr2 119965868 119966132	rs35741883	C/T	0.342	5	266	ATTATATTTTAGAGGGGTGGGTGAT	CTACAAAAATCCAAATTCTACAAAAAC	60 " 51
STEAP3 2	chr2 119969706 119969987	rs6759589	A/G	0.479	5	283	AGGGTTGAGTTTATATTATGTTATA	AAACACTACATCCCACTACAAAAAC	60 " 51
STEAP3 3	chr2 119975357 119975601	rs7595954	C/T	0.293	5	246	TTGGTTGTGTTTATTTGAGATTTGTATA	TATACCCCTAAACCTTTAAAAAAAA	60 " 51
STEAP3 4	chr2 119980126 119980394	rs838059	C/G	0.498	7	268	AGTTTTTGTTGGGGAGATAAGTTTT	CCCTAACTAAACAAAAAACTAAAAAATAAA	60 " 51
STEAP3 5	chr2 119981458 119981858	rs2289894	G/T	0.447	44	400	GTAGAGGTGAGTGTATTTTTTTT	CTACCAACCCTCCTTTAAAACC	60 " 51
STEAP3 6	chr2 119984632 119984921	rs838103	C/T	0.5	7	291	GGAATATATTTTGTTTTTGGGTTGA	ACCAACTAAATCCCACTTCTAACAA	60 " 51
STEAP3 7	chr2 119986283 119986583	rs865108	A/G	0.488	4	302	ATTTTGTGTTATTTGTGTTGGTGTG	AAATCTCCAAATCTCTTTAAAAAAACTAC	60 " 51
STEAP3 8	chr2 119988384 119988726	rs838100	A/G	0.448	11	344	TTTAGTTTTTGTGGTTAAGAGTTGG	CCTAAAAATTCAAAAAACACCCTC	60 " 51
STEAP3 9	chr2 119988987 119989264	rs838098	A/T	0.46	9	279	ATTTTTGTGGAATGTAGGTTTATTG	AAAAATACAAAAAACTCAAACACACTC	60 " 51
STEAP3 10	chr2 119997132 119997368	rs838090	C/T	0.414	6	238	ATTTTTGTTTTATGGGAGGGTTAG	CCAAAAACATACACTATTAATAAATCC	60 " 51
STEAP3 11	chr2 119999945 120000198	rs10196144	C/T	0.487	5	255	TTGGTTGTTAATAGAAATGAAGTTT	AACCTTAACTAACCACAAAAAAAA	60 " 51
STEAP3 12	chr2 120011889 120012232	rs12711924	A/G	0.481	9	345	ATGTGATTGTTTTGATTGGTTGTT	ACACTATAACAAAAACTAATACCCC	60 " 51
STEAP3 13	chr2 120013705 120014045	rs1867749	C/G	0.445	6	340	GGTATAGGATTTAGGGATAGTGATAG	ACAACCTACAATCTACTTTAATTATAAATA	60 " 51
STEAP3 14	chr2 120021847 120022153	rs3731603	G/T	0.464	6	306	GAGTAGTAAGGATGGTTTGTGATTG	AACACTCTAAAAAATAAAACTCCCC	60 " 51
STEAP3 15	chr2 120022998 120023308	rs11694139	C/T	0.297	5	310	AGTAGGTTTTAAGTTGAAGGTTTTT	TCACCAAACTACTAACAACAACATC	60 " 51
STEAP3 16	chr2 120047034 120047443	rs555740427	C/T	0.5	14	409	TTTAGTTGGGTGTGGTTGATAGTAG	AAACAAATCAAAAAATCAAATAATC	57 " 48
STEAP3 17	chr2 120048294 120048661	rs11123512	A/G	0.499	11	367	ATTTAGGAGGTTGAGATAGGAGATT	CCTTTACCTACCCTTCAACCACCAAAT	60 " 51
STEAP3 18	chr2 120048562 120048827	rs1530562	A/G	0.499	10	263	ATATAGTTTTTAATAAATGATTGAT	TCTAAATACCTACCAAACACCAACC	57 " 48
STEAP3 19	chr2 120049813 120050158	rs10779894	C/T	0.5	8	347	TTAGTAGTTTTGTGTGTATATGTGTTTTAA	ATTATACAATCCACTATTCAATTTTCTAC	60 " 51
STEAP3 20	chr2 120050948 120051331	rs4848546	A/G	0.5	5	385	GTAAAGGTTTTGGGGTATGTGTAT	CATCAACCAATTCTATCTACTCCAC	60 " 51
STEAP3 21	chr2 120054059 120054360	rs2860790	A/T	0.46	4	301	GTTAAAGGAATATTTGGGTTTTGGT	CCAAATACAAATCCTTAAACACTCAA	60 " 51
STEAP3 22	chr2 120063637 120063946	rs3816343	C/T	0.45	9	309	TATTTGTTTTTAATTGGAATTTTGT	CTACTTCTAAAATCCCCCAATTTC	60 " 51
STEAP3 23	chr2 120064309 120064590	rs6542520	C/G	0.48	5	281	TTTTATTGATTAAATTTTTTTGAAGTA	CACAACCAATTACCATAAAAATAATACC	60 " 51
STEAP3 24	chr2 120075732 120075964	rs6761125	A/G	0.476	4	232	AATTTTTTTATATTTGGGTAAAATT	TCACTATTAAAATTCCTTATTACAAC	60 " 51
STEAP3 25	chr2 120097818 120098075	rs6730220	A/G	0.498	7	259	TTAAAGTAATATAGGGGTATGTGTA	CATACTCAACTTTAATAATATAAAAAAC	60 " 51
STEAP3 26	chr2 120124107 120124315	rs3795890	C/T	0.218	12	210	TTTTTTTTAGATTTTAAGGGAGGAG	AAAATTAAATTCAATCCTAACCC	60 " 51
STEAP3 27	chr2 120124812 120125147	rs3731607	A/G	0.321	22	335	ATAAGGGTTTATATTGGAGAGAAGG	AAATTTCTAAATCTACTACCCACCC	60 " 51
STEAP3 28	chr2 120128259 120128596	rs956309	C/T	0.334	5	338	TGATGTTTTTGTTTAGAGATGGTGT	CAAATTCTCCATTAAAATTTAAACCAA	60 " 51
STEAP3 29	chr2 120129900 120130315	rs2289948	C/G	0.32	4	418	ATTGGATTTGGTTATTGTGTTATGT	AAAAAAAATCACTTCTACCATCCTC	62 " 53
RPN1 1	chr3 128290873 128291178	rs2712423	G/T	0.49	11	307	TTGGGTGGTTTTAGGTTAAGATAAT	AATATAAATTCCAAACCTCCTTACC	60 " 51
RPN1 2	chr3 128292811 128293152	rs6762732	C/T	0.46	10	343	TTGTAGAAAATTTGAGTAGTGGGTG	AACCTCCCCAAAAAACTAAAAAC	60 " 51
RPN1 3	chr3 128294237 128294546	rs2713575	A/G	0.497	8	311	AAAAATTAAAAGATAAAATGTGGATATATA	TAATCTCACACCTAACACCAAACAA	60 " 51
RPN1 4	chr3 128294701 128295001	rs2465354	C/T	0.356	9	302	AGTTGGTTTTTTAGAGGGGAAAATA	ACAAAATAAAAACTCCCAAAACTCA	60 " 51
RPN1 5	chr3 128295622 128295957	rs2713599	A/C	0.499	6	335	TGTTAGTAATTTAGAAGATATATTTTTAGA	TCCTACATTAATAATAATAAAAAACC	60 " 51
RPN1 6	chr3 128297311 128297627	rs9880192	C/G	0.364	7	316	TTTTTTTTAGGGTTTTAGAGTTAGTAT	AATATTTATAACTTCATTATCTTATTTTCC	60 " 51
RPN1 7	chr3 128303028 128303369	rs2010527	C/G	0.464	7	343	TGTTGTGAGTTAGTTTGTTATATTTT	TCACAAAACTATTTATCTTATAATCATTAT	60 " 51
RPN1 8	chr3 128303308 128303564	rs6798431	C/T	0.461	9	258	TTTTGTGTTTAGAAATTTTTTTTGAGTT	ACTATCCTTTCAAAAACCATCAAAC	60 " 51
RPN1 9	chr3 128322093 128322436	rs1806522	A/T	0.46	5	343	AGGGTATTTAGGTTTGGGGTTTAT	CCCTAAAAATAAAATCTCTCCTTCC	60 " 51
RPN1 10	chr3 128323929 128324188	rs1962040	A/G	0.462	5	261	GAGGATTTAGAGTGTGAATTTTATGG	ATACAACCTCACCTCACTCCTTATC	60 " 51
RPN1 11	chr3 128331906 128332173	rs2712405	A/G	0.428	10	269	TTTTGTGATTTGTGTTAGTAGGGTG	CTATATCCCCAAAACCAAAAACATA	60 " 51
RPN1 12	chr3 128335975 128336303	rs13325747	A/G	0.333	10	328	GGTTATATGAGGGTTATAGAGAAAGTA	TCCCCCAACATCCTATAATAAATAC	60 " 51
RPN1 13	chr3 128336138 128336373	rs2712429	A/C	0.195	9	237	AGGTTTTGTTTATTATTGGGGAAAT	CCATAAAAACCTAAACTCTCAACTACC	60 " 51
RPN1 14	chr3 128336486 128336770	rs2811488	C/T	0.438	29	286	TTTTGGAGTAGTTAGAAAGTTTGGT	AAAAATTAACTTTAATTCTATTAAAACC	60 " 51
RPN1 15	chr3 128337188 128337482	rs2811489	C/T	0.439	4	296	TTATTGGGAAAGATTTAGTTGAAAAT	AAAAAACAAATAACAACCCTACTCC	60 " 51
RPN1 16	chr3 128338281 128338650	rs2712381	G/T	0.436	4	371	TTAGAGTGTTGAAAGTGGTGTTAGAGT	CCACAAAACTTAACTAAATATAACAAACC	60 " 51
RPN1 17	chr3 128340753 128341040	rs2712419	A/G	0.437	5	289	GTTGAAGATAGAGGGTTTTGATTTG	CTCTCAATACTAACCACAAAAACAC	60 " 51
RPN1 18	chr3 128344501 128344815	rs1126828	C/T	0.353	5	316	GGAGAAGTAAGAGGATAGGTTTTAT	CCAAATAAACTACACTACACCTATCTAA	60 " 51
RPN1 19	chr3 128350811 128351159	rs9868579	C/T	0.46	4	348	GTTTTAGTAAATATAATTTTAAAATGTTGT	TATTCCACTATCTAACTATCTCTAATAATC	60 " 51
RPN1 20	chr3 128356653 128356915	rs1697	A/G	0.476	6	264	TTTTGATTTTGGGGTTAAGATTTTA	ACAAACACATCTCTAAAAAACCCATA	60 " 51
RPN1 21	chr3 128373346 128373688	rs6768344	A/G	0.48	9	344	GAATTTTATTAGAAGGAAGAAATTT	CATAACTTACTAAAACCTTAATCTCC	60 " 51
RPN1 22	chr3 128399501 128399830	rs9813845	C/G	0.441	28	329	TTTTTTTAGTTTTTTAGTATTAAATTTAG	CTTCAAAAAAAACAATCATCCTATC	60 " 51
RPN1 23	chr3 128404165 128404445	rs11712115	A/G	0.308	9	282	TTTTTTTAAGGAATATTGAGAAATGAAGT	TCAAACAAACAAAACCTAAATACCC	60 " 51
RPN1 24	chr3 128417105 128417319	rs7624610	G/T	0.364	16	214	GTTTTTTAGGGTTTAGAAGGTTGTA	ATCCCAAACAAATAACAATAACTAA	60 " 51
VTRNA2 1	chr5 135344126 135344440	rs6892697	A/G	0.498	4	314	GGATGTATTTAATATATTTATTTTTGT	CTAAACCCTCCATACCAATTATACC	60 " 51
VTRNA2 2	chr5 135354956 135355266	rs6894906	A/G	0.44	5	310	TGATAAGAATAGGATTTTGAGTTGA	TTTCTCCCCAACTAACAACAAAC	60 " 51
VTRNA2 3	chr5 135364074 135364386	rs17169707	C/T	0.347	5	314	GATTTTGGGATTGAGGGATAGTT	CAACTTAAAACCCAACAAAACCTAC	60 " 51
VTRNA2 4	chr5 135365849 135366170	rs2237063	A/G	0.361	4	321	GAATTTTGTAGTGATTTTTTAGAGGAAGT	AAAATAACCAAATATACTCCCAACA	60 " 51
VTRNA2 5	chr5 135367456 135367783	rs2237066	C/T	0.438	6	327	TTTTTGTTGGTTATATTTTAGTTTT	AACCCAAAAACAACTTACTCATTTC	60 " 51
VTRNA2 6	chr5 135378594 135378887	rs3805700	C/T	0.453	6	293	TTTTTTAGAGGTTTTTTTAGAGTTTTAAAG	AAACCAAATCCCCAAATTCTACTA	60 " 51
VTRNA2 7	chr5 135379943 135380251	rs2074558	A/G	0.477	4	310	TGTTTATTGGTTTTAGGTTTTATG	AATAACTTAAAATTACCAACCCACC	60 " 51
VTRNA2 8	chr5 135381978 135382274	rs3749786	C/T	0.2	11	296	TGGATTTTTAGAGGTTATTTTTTTT	AACTACAAACTCCCATTCATCATAC	60 " 51
VTRNA2 9	chr5 135382843 135383140	rs1442	C/G	0.413	7	299	GTTTGGGTTTTTATTTAGGGTAGTTTT	TCCACAACTTATAAAACCCACATTT	60 " 51
VTRNA2 10	chr5 135384639 135384939	rs6596281	A/T	0.476	3	302	GGTGTGATTTTTTTATGTATGGGTT	CAACCAACCTAACCATCTTTCATAT	60 " 51
VTRNA2 11	chr5 135385089 135385379	rs17169753	C/T	0.495	7	290	TTTTGAGGGTTATTTTATGGTAGGT	ATCTTCAAAAAACACTCCATCTTCT	60 " 51
VTRNA2 12	chr5 135386479 135386772	rs2237070	A/G	0.453	5	295	GGGAAAGGGTATATTTTTGAAAGTATAG	TTCTAAAAACCTTTAAACCCCTTAAA	60 " 51
VTRNA2 13	chr5 135387622 135387885	rs17169768	A/G	0.486	5	263	TTTTGTTTATGATAGTGTGGTTTTG	AAAACTAAAACCCAAAAAAAACTCC	60 " 51
VTRNA2 14	chr5 135388522 135388790	rs1054124	A/G	0.483	8	268	GGTAGGTTGTAAGTGGTTTTTGAG	ACTCATCAATATAATAAATCACCCC	60 " 51
VTRNA2 15	chr5 135391265 135391550	rs6860369	A/G	0.494	9	285	TTATTTTTATGGATAATGATTTTGTTATAT	CATAACCACTAAACAAAAACTCCAC	60 " 51
VTRNA2 16	chr5 135392264 135392561	rs4669	C/T	0.494	6	297	GTTAATTGTTTGTTGTTGGGGTT	AATATTTAAAAAAAATACCTCTCAAC	60 " 51
VTRNA2 17	chr5 135396741 135397053	rs2302038	A/G	0.441	7	314	AATTTATGGTAGAATTTGGTTTATG	TTAAACTATACCTATATAACTAATTACAAA	60 " 51
VTRNA2 18	chr5 135397442 135397756	rs6886556	C/T	0.499	4	314	GGAAGGGATGGTTTTATATATATAG	AAAAACCAAAACAACTCCCTAACTT	60 " 51
VTRNA2 19	chr5 135406664 135406996	rs2058042	C/T	0.495	6	334	GTAGAGATAGAGGGGAAAGATTTATG	CTTATTCCTATACCCCTTCTTTTCTC	60 " 51
VTRNA2 20	chr5 135407686 135408041	rs6892173	C/G	0.5	5	357	TGTTTTTTGTGTGTAGTTAATAAGTTTTTT	ATTTCCCAACCCATAAATTCTCTA	60 " 51
VTRNA2 21	chr5 135414814 135415155	rs17169806	C/T	0.477	13	341	GTGTTTTTATTTGTGGTGTATGTTG	TAAATTATTTCTCTCCCAAAAAAAA	60 " 51
VTRNA2 22	chr5 135415036 135415364	rs2346018	A/G	0.499	19	330	GGGTATAGGAGGGGAGGTGTATAT	AAACAAAAAATACAAACCCAAAAAC	60 " 51
VTRNA2 23	chr5 135415564 135415817	rs2346019	A/G	0.499	10	254	TTTAAATTTGGTTAATAATGTATTAGA	CAAAACTTACCTATTAAACCACAAC	60 " 51
VTRNA2 24	chr5 135416223 135416573	rs9327740	A/G	0.172	24	350	TATAGAGATGGATAGATAGAAAGTT	CTCCTCAACAACCTAACTACTAAAC	60 " 51
VTRNA2 25	chr5 135418003 135418331	rs917303	C/T	0.459	5	328	TTTAGAAGTGGAATTGTTGGGTT	CCACCAAAAAAAACACCTAAAAC	60 " 51
VTRNA2 26	chr5 135453279 135453574	rs2548979	A/G	0.464	4	295	ATTAAAGGATTTTTTAGAGGGTTGG	CCCATAAACAATAACCTAAATTTCCTA	60 " 51
VTRNA2 27	chr5 135453647 135453967	rs2906830	A/G	0.487	5	320	GGGGAAATTGAGAGAGTTTTTTT	TCTACCAAATAACCAACCTTCCTAC	60 " 51
VTRNA2 28	chr5 135457216 135457540	rs2906837	C/T	0.486	4	326	AAAGTATTTTTTAAGGTTTTTTATTTAAGG	AAAATTTAATCAACAAACTAATACCCTATA	60 " 51
VTRNA2 29	chr5 135464427 135464764	rs1558093	C/T	0.489	3	337	TGGTAGATGGTTGGAGATAGGTAAG	CCACAAACTCCTTAAAACTTCAAAA	60 " 51
VTRNA2 30	chr5 135469373 135469676	rs3764942	A/G	0.296	9	303	TGGTTTAGGGTGTTTAGTTATTTTTTATT	AAACTCAAATTAATATTCCAATCTCTTC	60 " 51
VTRNA2 31	chr5 135469817 135470093	rs10085013	A/T	0.487	3	278	TTTTATTTTTTTGTGGAAAAGTTTTG	AAACTAAAATTTTCAATCTTTTATCTTTCA	60 " 51
VTRNA2 32	chr5 135488101 135488346	rs10214039	A/G	0.485	3	247	TTTTATGTTATTGTTTGGGTTTTAGTTG	AAAATATATAAAATCTCCTACAAATC	60 " 51
VTRNA2 33	chr5 135508092 135508424	rs4585442	A/G	0.489	5	332	AAATTTTTTTTGTGTTTGGTTTGTT	ACACCTTTCACAATACATAATTCATAAC	60 " 51
VTRNA2 34	chr5 135517649 135517906	rs1190	A/C	0.343	3	257	GATTTTTTGGTTTTATTGGAGTTTT	ATCCAATCCTAAAACAAAATTCTTC	60 " 51
VTRNA2 35	chr5 135522071 135522314	rs7705301	A/G	0.487	3	243	TTTGAAAGAGTATTGTGAGAAAGAAATT	TTATAAATCCTACTTCTCCACCCTC	60 " 51
VTRNA2 36	chr5 135527752 135528054	rs2287962	A/C	0.469	32	302	ATTTTAGTTTAGGAAGGGTTTTTGG	CACCTACCTACTACTCTTCTTCCTACTACT	60 " 51
VTRNA2 37	chr5 135528247 135528582	rs6889814	C/T	0.469	33	337	GTATTTGGAGTTTATTGGAGTTGAG	CTTCACTTAACCTAAAACATACTAAC	60 " 51
VTRNA2 38	chr5 135537692 135537941	rs10041689	A/G	0.458	4	251	TTTTGAGAAGGGTATGAAAGAGGTA	CAACTCAATTCTAAATCCCACAATT	60 " 51
